# Supplementary material for: Streptomyces coelicolor Vesicles: Many Molecules To Be Delivered
Source: PubMed Central journal article supplement (PMC8752130; doi:10.1128/aem.01881-21), 2022-01-11
Supplement: aem.01881-21-s0001.pdf [file aem.01881-21-s0001.pdf]

## ***Streptomyces coelicolor* vesicles: many molecules to be delivered**

Teresa Faddetta, <sup>a#</sup> Giovanni Renzone, <sup>b</sup>Alberto Vassallo, <sup>c</sup> Emilio Rimini, <sup>a</sup> Giorgio Nasillo, <sup>d</sup> Gianpiero Buscarino, <sup>e</sup> Simonpietro Agnello, <sup>e</sup>

Mariano Licciardi, <sup>a</sup> Luigi Botta, <sup>f</sup> Andrea Scaloni, <sup>b</sup> Antonio Palumbo Piccionello, <sup>a</sup> Anna Maria Puglia<sup>a</sup> and Giuseppe Gallo<sup>a</sup>

<sup>a</sup>Department of Biological Chemical and Pharmaceutical Sciences and Technology (STEBICEF), University of Palermo, Palermo, Italy

<sup>b</sup>Proteomic and Mass Spectrometry Laboratory, ISPAAM, Consiglio Nazionale delle Ricerche Napoli, Italy

<sup>c</sup>Department of Biology, University of Florence, Sesto Fiorentino, Italy

<sup>d</sup>Advanced Technologies Network (ATeN Center), University of Palermo, Palermo, Italy

<sup>e</sup>Department of Physics and Chemistry, University of Palermo, Palermo, Italy

<sup>f</sup>Department of Engineering, University of Palermo, Palermo, Italy

Running Head: Membrane vesicles of *Streptomyces coelicolor*

# Address correspondence to Teresa Faddetta, [teresa.faddetta@unipa.it](mailto:teresa.faddetta@unipa.it)

**SUPPLEMENTAL MATERIAL**

**Table S1:** Proteins identified in *S. coelicolor* MVs. For each protein, reported are UniProtKB accession, description, assignment at the luminal and/or external portion of MVs, SCO accession, gene name, functional classification and subcellular localization.

|   | UniProtKB accession number | Description                                                                 | F3      | F4      | SCO     | Gene | KEGG Orthology                                                                                                                | Subcellular localization                               |
|---|----------------------------|-----------------------------------------------------------------------------|---------|---------|---------|------|-------------------------------------------------------------------------------------------------------------------------------|--------------------------------------------------------|
| 1 | P12690                     | Spore-associated protein A                                                  | IN      | IN      | SCO0409 | sapA | Unknown                                                                                                                       | Extracellular                                          |
| 2 | Q9RJM5                     | NH(3)-dependent NAD(+) synthetase                                           | -       | OUT     | SCO0506 | nadE | •Metabolism of cofactors and vitamins<br>Nicotinate and nicotinamide metabolism                                               | Peripheral inner membrane protein facing the cytoplasm |
| 3 | P48859                     | Cold shock protein ScoF                                                     | OUT     | -       | SCO0527 | scoF | •Unclassified: genetic information processing<br>Transcription                                                                | Cytoplasmic                                            |
| 4 | Q9RJH9                     | Catalase-peroxidase                                                         | OUT     | OUT     | SCO0560 | katG | •Amino acid metabolism<br>Phenylalanine metabolism<br>Tryptophan metabolism                                                   | Cytoplasmic                                            |
| 5 | Q9XA86                     | Putative membrane protein SCO0839                                           | OUT     | -       | SCO0839 | /    | Unknown                                                                                                                       | Integral membrane                                      |
| 6 | Q93J59                     | 5-methyltetrahydropteroyltrimethylglutamate--homocysteine methyltransferase | OUT     | IN      | SCO0985 | metE | •Amino acid metabolism<br>Cysteine and methionine metabolism<br>•Metabolism of other amino acids<br>Selenocompound metabolism | Cytoplasmic                                            |
| 7 | Q9FCD7                     | Tripeptidyl aminopeptidase                                                  | UNKNOWN | IN      | SCO1230 | tap  | Unknown                                                                                                                       | Extracellular;<br>Vesicles                             |
| 8 | Q8CK28                     | ATP phosphoribosyltransferase                                               | -       | OUT     | SCO1438 | hisG | •Amino acid metabolism<br>Histidine metabolism                                                                                | Cytoplasmic                                            |
| 9 | Q9EWJ9                     | 6,7-dimethyl-8-ribityllumazine synthase                                     | OUT     | UNKNOWN | SCO1440 | ribH | •Metabolism of cofactors and vitamins<br>Riboflavin metabolism                                                                | Peripheral inner membrane protein facing the cytoplasm |

|    |        |                                        |     |         |         |      |                                                                                                                                                                                                                                                                            |                                                        |
|----|--------|----------------------------------------|-----|---------|---------|------|----------------------------------------------------------------------------------------------------------------------------------------------------------------------------------------------------------------------------------------------------------------------------|--------------------------------------------------------|
| 10 | Q9L0Y3 | S-adenosylmethionine synthase          | OUT | OUT     | SCO1476 | metK | <ul style="list-style-type: none"> <li>•Amino acid metabolism</li> <li>Cysteine and methionine metabolism</li> </ul>                                                                                                                                                       | Peripheral inner membrane protein facing the cytoplasm |
| 11 | Q9KXR7 | Dihydroorotate dehydrogenase (quinone) | IN  | -       | SCO1482 | pyrD | <ul style="list-style-type: none"> <li>•Nucleotide metabolism</li> <li>Pyrimidine metabolism</li> </ul>                                                                                                                                                                    | Peripheral inner membrane protein facing the cytoplasm |
| 12 | Q9KXP5 | 30S ribosomal protein S4               | OUT | UNKNOWN | SCO1505 | rpsD | <ul style="list-style-type: none"> <li>•Translation</li> <li>Ribosome</li> <li>•Protein families: genetic information processing</li> <li>Ribosome</li> </ul>                                                                                                              | Ribosomal                                              |
| 13 | Q53956 | Protein translocase subunit SecF       | IN  | IN      | SCO1515 | secF | <ul style="list-style-type: none"> <li>•Folding, sorting and degradation</li> <li>Protein export</li> <li>•Membrane transport</li> <li>Bacterial secretion system</li> <li>•Protein families: signaling and cellular processes</li> <li>Secretion system</li> </ul>        | Integral membrane                                      |
| 14 | Q53955 | Protein translocase subunit SecD       | OUT | -       | SCO1516 | secD | <ul style="list-style-type: none"> <li>•Folding, sorting and degradation</li> <li>Protein export</li> <li>•Membrane transport</li> <li>Bacterial secretion system</li> <li>•Protein families: signaling and cellular processes</li> <li>Secretion system</li> </ul>        | Integral membrane                                      |
| 15 | Q9L278 | Threonine--tRNA ligase                 | OUT | OUT     | SCO1531 | thrS | <ul style="list-style-type: none"> <li>•Translation</li> <li>Aminoacyl-tRNA biosynthesis</li> <li>•Protein families: metabolism</li> <li>Amino acid related enzymes</li> <li>•Protein families: genetic information processing</li> <li>Transfer RNA biogenesis</li> </ul> | Peripheral inner membrane protein facing the cytoplasm |

|    |        |                                                   |         |         |         |      |                                                                                                                                                                                                                                                                            |                                                        |
|----|--------|---------------------------------------------------|---------|---------|---------|------|----------------------------------------------------------------------------------------------------------------------------------------------------------------------------------------------------------------------------------------------------------------------------|--------------------------------------------------------|
| 16 | O88054 | Phenylalanine--tRNA ligase beta subunit           | OUT     | -       | SCO1594 | pheT | <ul style="list-style-type: none"> <li>•Translation</li> <li>Aminoacyl-tRNA biosynthesis</li> <li>•Protein families: metabolism</li> <li>Amino acid related enzymes</li> <li>•Protein families: genetic information processing</li> <li>Transfer RNA biogenesis</li> </ul> | Peripheral inner membrane protein facing the cytoplasm |
| 17 | O88058 | 50S ribosomal protein L20                         | IN      | UNKNOWN | SCO1598 | rplT | <ul style="list-style-type: none"> <li>•Translation</li> <li>Ribosome</li> <li>•Protein families: genetic information processing</li> <li>Ribosome</li> </ul>                                                                                                              | Ribosomal                                              |
| 18 | O88059 | 50S ribosomal protein L35                         | OUT     | -       | SCO1599 | rplM | <ul style="list-style-type: none"> <li>•Translation</li> <li>Ribosome</li> <li>•Protein families: genetic information processing</li> <li>Ribosome</li> </ul>                                                                                                              | Ribosomal                                              |
| 19 | O88060 | Translation initiation factor IF-3                | OUT     | UNKNOWN | SCO1600 | infC | <ul style="list-style-type: none"> <li>•Protein families: genetic information processing</li> <li>Translation factors</li> </ul>                                                                                                                                           | Peripheral inner membrane protein facing the cytoplasm |
| 20 | Q9RJ68 | Sec-independent protein translocase protein TataA | IN      | -       | SCO1633 | tatA | <ul style="list-style-type: none"> <li>•Folding, sorting and degradation</li> <li>Protein export</li> <li>•Membrane transport</li> <li>Bacterial secretion system</li> <li>•Protein families: signaling and cellular processes</li> <li>Secretion system</li> </ul>        | Cytoplasmic, Integral membrane                         |
| 21 | Q9RJ61 | Pup--protein ligase                               | OUT     | UNKNOWN | SCO1640 | pafA | <ul style="list-style-type: none"> <li>•Protein families: genetic information processing</li> <li>Proteasome</li> </ul>                                                                                                                                                    | Cytoplasmic                                            |
| 22 | P19255 | Probable glycerol uptake facilitator protein      | UNKNOWN | IN      | SCO1659 | glpF | <ul style="list-style-type: none"> <li>•Protein families: signaling and cellular processes</li> <li>Transporters</li> </ul>                                                                                                                                                | Integral membrane                                      |
| 23 | Q9XAC0 | Transaldolase 2                                   | OUT     | UNKNOWN | SCO1936 | tal2 | <ul style="list-style-type: none"> <li>•Carbohydrate metabolism</li> <li>Pentose phosphate pathway</li> </ul>                                                                                                                                                              | Cytoplasmic                                            |

|    |        |                                                |     |         |         |      |                                                                                                                                                                                                                                                                                                      |                                                        |
|----|--------|------------------------------------------------|-----|---------|---------|------|------------------------------------------------------------------------------------------------------------------------------------------------------------------------------------------------------------------------------------------------------------------------------------------------------|--------------------------------------------------------|
| 24 | Q9Z523 | Glucose-6-phosphate isomerase 2                | OUT | -       | SCO1942 | pgi2 | <ul style="list-style-type: none"> <li>•Carbohydrate metabolism<br/>Glycolysis / Gluconeogenesis<br/>Pentose phosphate pathway<br/>Starch and sucrose metabolism<br/>Amino sugar and nucleotide sugar metabolism</li> <li>•Protein families: signaling and cellular processes<br/>Exosome</li> </ul> | Cytoplasmic                                            |
| 25 | Q9Z520 | Triosephosphate isomerase                      | IN  | -       | SCO1945 | tpiA | <ul style="list-style-type: none"> <li>•Carbohydrate metabolism<br/>Glycolysis / Gluconeogenesis<br/>Fructose and mannose metabolism<br/>Inositol phosphate metabolism</li> <li>•Protein families: signaling and cellular processes<br/>Exosome</li> </ul>                                           | Peripheral inner membrane protein facing the cytoplasm |
| 26 | Q9Z519 | Phosphoglycerate kinase                        | IN  | -       | SCO1946 | pgk  | <ul style="list-style-type: none"> <li>•Carbohydrate metabolism<br/>Glycolysis / Gluconeogenesis</li> <li>•Protein families: signaling and cellular processes<br/>Exosome</li> </ul>                                                                                                                 | Peripheral inner membrane protein facing the cytoplasm |
| 27 | Q9Z518 | Glyceraldehyde-3-phosphate dehydrogenase       | OUT | UNKNOWN | SCO1947 | gap  | <ul style="list-style-type: none"> <li>•Carbohydrate metabolism<br/>Glycolysis / Gluconeogenesis</li> <li>•Protein families: genetic information processing<br/>Membrane trafficking</li> <li>• Protein families: signaling and cellular processes<br/>Exosome</li> </ul>                            | Peripheral inner membrane protein facing the cytoplasm |
| 28 | Q9Z513 | Nucleotide-binding protein SCO1952             | -   | OUT     | SCO1952 | /    | <ul style="list-style-type: none"> <li>•Protein families: genetic information processing<br/>Messenger RNA biogenesis</li> </ul>                                                                                                                                                                     | Cytoplasmic                                            |
| 29 | Q9S2U8 | Prolipoprotein diacylglyceryl transferase<br>1 | IN  | IN      | SCO2034 | lgt1 | Unknown                                                                                                                                                                                                                                                                                              | Integral membrane                                      |

|    |        |                                                                                                                     |     |    |         |       |                                                                                                                                                                                                                                                                                                       |                                                        |
|----|--------|---------------------------------------------------------------------------------------------------------------------|-----|----|---------|-------|-------------------------------------------------------------------------------------------------------------------------------------------------------------------------------------------------------------------------------------------------------------------------------------------------------|--------------------------------------------------------|
| 30 | Q9S2X7 | Lipoprotein signal peptidase                                                                                        | IN  | -  | SCO2074 | lspA  | <ul style="list-style-type: none"> <li>•Folding, sorting and degradation</li> <li>Protein export</li> <li>•Protein families: metabolism</li> <li>Peptidases</li> </ul>                                                                                                                                | Integral membrane                                      |
| 31 | Q9S2X5 | Isoleucine--tRNA ligase                                                                                             | -   | IN | SCO2076 | ileS  | <ul style="list-style-type: none"> <li>•Translation</li> <li>Aminoacyl-tRNA biosynthesis</li> <li>•Protein families: metabolism</li> <li>Amino acid related enzymes</li> <li>•Protein families: genetic information processing</li> <li>Transfer RNA biogenesis</li> </ul>                            | Cytoplasmic                                            |
| 32 | Q9S2X2 | Cell division protein SepF 2                                                                                        | IN  | -  | SCO2079 | sepF2 | <ul style="list-style-type: none"> <li>•Protein families: genetic information processing</li> <li>Chromosome and associated proteins</li> </ul>                                                                                                                                                       | Peripheral inner membrane protein facing the cytoplasm |
| 33 | Q9ZBA5 | UDP-N-acetylglucosamine--N-acetylmuramyl-(pentapeptide) pyrophosphoryl-undecaprenol N-acetylglucosamine transferase | OUT | -  | SCO2084 | murG  | <ul style="list-style-type: none"> <li>•Glycan biosynthesis and metabolism</li> <li>Peptidoglycan biosynthesis</li> <li>•Drug resistance: Antimicrobial</li> <li>Vancomycin resistance</li> <li>•Protein families: metabolism</li> <li>Peptidoglycan biosynthesis and degradation proteins</li> </ul> | Peripheral inner membrane protein facing the cytoplasm |
| 34 | P56833 | Phospho-N-acetylmuramoyl-pentapeptide-transferase                                                                   | IN  | -  | SCO2087 | mraY  | <ul style="list-style-type: none"> <li>•Glycan biosynthesis and metabolism</li> <li>Peptidoglycan biosynthesis</li> <li>•Drug resistance: Antimicrobial</li> <li>Vancomycin resistance</li> <li>•Protein families: metabolism</li> <li>Peptidoglycan biosynthesis and degradation proteins</li> </ul> | Integral membrane                                      |
| 35 | Q9S2N0 | Bacterioferritin                                                                                                    | IN  | IN | SCO2113 | bfr   | <ul style="list-style-type: none"> <li>•Metabolism of cofactors and vitamins</li> <li>Porphyrin and chlorophyll metabolism</li> </ul>                                                                                                                                                                 | Cytoplasmic                                            |

|    |        |                                                                        |     |     |         |          |                                                                                                                                                                                                                                                                                                                                                  |                                                        |
|----|--------|------------------------------------------------------------------------|-----|-----|---------|----------|--------------------------------------------------------------------------------------------------------------------------------------------------------------------------------------------------------------------------------------------------------------------------------------------------------------------------------------------------|--------------------------------------------------------|
| 36 | P80574 | Phospho-2-dehydro-3-deoxyheptonate aldolase                            | -   | OUT | SCO2115 | aroH     | <ul style="list-style-type: none"> <li>•Amino acid metabolism<br/>Phenylalanine, tyrosine and tryptophan biosynthesis</li> <li>•Cellular community - prokaryotes<br/>Quorum sensing</li> </ul>                                                                                                                                                   | Cytoplasmic                                            |
| 37 | Q9X806 | Cytochrome bc1 complex cytochrome b subunit                            | IN  | IN  | SCO2148 | qcrB     | <ul style="list-style-type: none"> <li>•Energy metabolism<br/>Oxidative phosphorylation</li> </ul>                                                                                                                                                                                                                                               | Integral membrane                                      |
| 38 | Q9X807 | Cytochrome bc1 complex Rieske iron-sulfur subunit                      | IN  | IN  | SCO2149 | qcrA     | <ul style="list-style-type: none"> <li>•Energy metabolism<br/>Oxidative phosphorylation</li> </ul>                                                                                                                                                                                                                                               | Integral membrane                                      |
| 39 | Q9X813 | Probable cytochrome c oxidase subunit 1-alpha                          | IN  | IN  | SCO2155 | ctaD1    | <ul style="list-style-type: none"> <li>•Energy metabolism<br/>Oxidative phosphorylation</li> </ul>                                                                                                                                                                                                                                               | Integral membrane                                      |
| 40 | Q9X814 | Probable cytochrome c oxidase subunit 2                                | IN  | IN  | SCO2156 | ctaC/cox | <ul style="list-style-type: none"> <li>•Energy metabolism<br/>Oxidative phosphorylation</li> </ul>                                                                                                                                                                                                                                               | Integral membrane                                      |
| 41 | Q9S2R1 | Nicotinate-nucleotide--dimethylbenzimidazole phosphoribosyltransferase | OUT | -   | SCO2175 | cobT     | <ul style="list-style-type: none"> <li>•Metabolism of cofactors and vitamins<br/>Porphyrin and chlorophyll metabolism</li> </ul>                                                                                                                                                                                                                 | Cytoplasmic                                            |
| 42 | Q9S2Q7 | Probable cytosol aminopeptidase                                        | OUT | IN  | SCO2179 | pepA     | <ul style="list-style-type: none"> <li>•Metabolism of other amino acids<br/>Glutathione metabolism</li> <li>•Protein families: metabolism<br/>Peptidases</li> </ul>                                                                                                                                                                              | Peripheral inner membrane protein facing the cytoplasm |
| 43 | P15106 | Glutamine synthetase                                                   | OUT | OUT | SCO2198 | glnA     | <ul style="list-style-type: none"> <li>•Carbohydrate metabolism<br/>Glyoxylate and dicarboxylate metabolism</li> <li>•Energy metabolism<br/>Nitrogen metabolism</li> <li>•Amino acid metabolism<br/>Alanine, aspartate and glutamate metabolism</li> <li>Arginine biosynthesis</li> <li>•Signal transduction<br/>Two-component system</li> </ul> | Cytoplasmic                                            |

|    |        |                                                  |     |     |         |       |                                                                                                                                                                                                                                                                            |             |
|----|--------|--------------------------------------------------|-----|-----|---------|-------|----------------------------------------------------------------------------------------------------------------------------------------------------------------------------------------------------------------------------------------------------------------------------|-------------|
| 44 | Q9L2H4 | Isoprenyl transferase 1                          | IN  | -   | SCO2509 | uppS1 | <ul style="list-style-type: none"> <li>•Metabolism of terpenoids and polyketides</li> <li>Terpenoid backbone biosynthesis</li> <li>• Protein families: metabolism</li> <li>Prenyltransferases</li> </ul>                                                                   | Cytoplasmic |
| 45 | Q9RDE2 | Tricorn protease homolog 1                       | OUT | -   | SCO2549 | tri1  | <ul style="list-style-type: none"> <li>•Protein families: metabolism</li> <li>Peptidases</li> </ul>                                                                                                                                                                        | Cytoplasmic |
| 46 | Q9RDM3 | 30S ribosomal protein S20                        | OUT | -   | SCO2563 | rpsT  | <ul style="list-style-type: none"> <li>•Translation</li> <li>Ribosome</li> <li>•Protein families: genetic information processing</li> <li>Ribosome</li> </ul>                                                                                                              | Ribosomal   |
| 47 | Q9L111 | 50S ribosomal protein L27                        | OUT | OUT | SCO2596 | rpmA  | <ul style="list-style-type: none"> <li>•Translation</li> <li>Ribosome</li> <li>•Protein families: genetic information processing</li> <li>Ribosome</li> </ul>                                                                                                              | Ribosomal   |
| 48 | Q9L110 | 50S ribosomal protein L21                        | OUT | -   | SCO2597 | rpIU  | <ul style="list-style-type: none"> <li>•Translation</li> <li>Ribosome</li> <li>•Protein families: genetic information processing</li> <li>Ribosome</li> </ul>                                                                                                              | Ribosomal   |
| 49 | O06851 | Valine--tRNA ligase                              | -   | OUT | SCO2615 | valS  | <ul style="list-style-type: none"> <li>•Translation</li> <li>Aminoacyl-tRNA biosynthesis</li> <li>•Protein families: metabolism</li> <li>Amino acid related enzymes</li> <li>•Protein families: genetic information processing</li> <li>Transfer RNA biogenesis</li> </ul> | Cytoplasmic |
| 50 | Q9ZH58 | ATP-dependent Clp protease proteolytic subunit 2 | OUT | -   | SCO2618 | clpP2 | <ul style="list-style-type: none"> <li>•Protein families: metabolism</li> <li>Peptidases</li> </ul>                                                                                                                                                                        | Cytoplasmic |
| 51 | Q9F315 | ATP-dependent Clp protease proteolytic subunit 1 | -   | OUT | SCO2619 | clpP1 | <ul style="list-style-type: none"> <li>•Protein families: metabolism</li> <li>Peptidases</li> </ul>                                                                                                                                                                        | Cytoplasmic |
| 52 | O51917 | Superoxide dismutase [Fe-Zn] 1                   | IN  | IN  | SCO2633 | sodF1 | Unknown                                                                                                                                                                                                                                                                    | Cytoplasmic |



|    |        |                                             |     |     |         |       |                                                                                                                                                                                                                                                                                                                        |                                                                 |
|----|--------|---------------------------------------------|-----|-----|---------|-------|------------------------------------------------------------------------------------------------------------------------------------------------------------------------------------------------------------------------------------------------------------------------------------------------------------------------|-----------------------------------------------------------------|
| 53 | Q9RDI1 | Ribose import ATP-binding protein RbsA<br>2 | OUT | -   | SCO2746 | rbsA2 | <ul style="list-style-type: none"> <li>•Membrane transport<br/>ABC transporters</li> <li>•Protein families: signaling and cellular<br/>processes<br/>Transporters</li> </ul>                                                                                                                                           | Peripheral inner<br>membrane<br>protein facing<br>the cytoplasm |
| 54 | P54740 | Serine/threonine-protein kinase PkaB        | OUT | -   | SCO2973 | pkaB  | <ul style="list-style-type: none"> <li>•Protein families: metabolism<br/>Protein kinases</li> </ul>                                                                                                                                                                                                                    | Integral<br>membrane                                            |
| 55 | P54739 | Serine/threonine-protein kinase PkaA        | IN  | -   | SCO2974 | pkaA  | <ul style="list-style-type: none"> <li>•Protein families: metabolism<br/>Protein kinases</li> </ul>                                                                                                                                                                                                                    | Integral<br>membrane                                            |
| 56 | P0A4G6 | Protein translocase subunit SecA            | OUT | OUT | SCO3005 | secA  | <ul style="list-style-type: none"> <li>•Folding, sorting and degradation<br/>Protein export</li> <li>•Membrane transport<br/>Bacterial secretion system</li> <li>•Cellular community - prokaryotes<br/>Quorum sensing</li> <li>•Protein families: signaling and cellular<br/>processes<br/>Secretion system</li> </ul> | Peripheral inner<br>membrane<br>protein facing<br>the cytoplasm |
| 57 | Q9KZM1 | Adenosylhomocysteinase                      | -   | OUT | SCO3023 | ahcY  | <ul style="list-style-type: none"> <li>•Amino acid metabolism<br/>Cysteine and methionine<br/>metabolism</li> <li>•Protein families: metabolism<br/>Protein phosphatases and associated<br/>proteins</li> <li>•Protein families: signaling and cellular<br/>processes<br/>Exosome</li> </ul>                           | Cytoplasmic                                                     |

|    |        |                                               |         |         |         |      |                                                                                                                                                                                                                                                                                                                                                                                                        |                                                                 |
|----|--------|-----------------------------------------------|---------|---------|---------|------|--------------------------------------------------------------------------------------------------------------------------------------------------------------------------------------------------------------------------------------------------------------------------------------------------------------------------------------------------------------------------------------------------------|-----------------------------------------------------------------|
| 58 | Q9F2Q3 | Enolase 1                                     | OUT     | OUT     | SCO3096 | eno1 | <ul style="list-style-type: none"> <li>•Carbohydrate metabolism<br/>Glycolysis / Gluconeogenesis</li> <li>•Energy metabolism<br/>Methane metabolism</li> <li>•Folding, sorting and degradation<br/>RNA degradation</li> <li>•Protein families: genetic information<br/>processing<br/>Messenger RNA biogenesis</li> <li>•Protein families: signaling and cellular<br/>processes<br/>Exosome</li> </ul> | Cytoplasmic                                                     |
| 59 | Q9K3U0 | Ribose-phosphate pyrophosphokinase            | -       | OUT     | SCO3123 | prs  | <ul style="list-style-type: none"> <li>•Carbohydrate metabolism<br/>Pentose phosphate pathway</li> <li>•Nucleotide metabolism<br/>Purine metabolism</li> </ul>                                                                                                                                                                                                                                         | Peripheral inner<br>membrane<br>protein facing<br>the cytoplasm |
| 60 | Q9RNU9 | Phosphoenolpyruvate carboxylase               | UNKNOWN | UNKNOWN | SCO3127 | ppc  | <ul style="list-style-type: none"> <li>•Carbohydrate metabolism<br/>Pyruvate metabolism</li> <li>•Energy metabolism<br/>Methane metabolism</li> </ul>                                                                                                                                                                                                                                                  | Peripheral inner<br>membrane<br>protein facing<br>the cytoplasm |
| 61 | Q9RKA8 | Cyclic pyranopterin monophosphate<br>synthase | -       | IN      | SCO3180 | moaC | <ul style="list-style-type: none"> <li>•Metabolism of cofactors and vitamins<br/>Folate biosynthesis</li> <li>•Folding, sorting and degradation<br/>Sulfur relay system</li> </ul>                                                                                                                                                                                                                     | Cytoplasmic                                                     |
| 62 | Q9X895 | Lysine--tRNA ligase                           | -       | OUT     | SCO3303 | lysS | <ul style="list-style-type: none"> <li>•Translation<br/>Aminoacyl-tRNA biosynthesis</li> <li>•Protein families: metabolism<br/>Amino acid related enzymes</li> <li>•Protein families: genetic information<br/>processing<br/>Transfer RNA biogenesis</li> </ul>                                                                                                                                        | Cytoplasmic                                                     |

|    |        |                                                      |         |         |         |           |                                                                                                                                                                                                                                                                                                                                                                   |                                                        |
|----|--------|------------------------------------------------------|---------|---------|---------|-----------|-------------------------------------------------------------------------------------------------------------------------------------------------------------------------------------------------------------------------------------------------------------------------------------------------------------------------------------------------------------------|--------------------------------------------------------|
| 63 | Q9WX29 | Arginine--tRNA ligase                                | OUT     | UNKNOWN | SCO3304 | argS      | <ul style="list-style-type: none"> <li>•Translation</li> <li>Aminoacyl-tRNA biosynthesis</li> <li>•Protein families: metabolism</li> <li>Amino acid related enzymes</li> <li>•Protein families: genetic information processing</li> <li>Transfer RNA biogenesis</li> </ul>                                                                                        | Cytoplasmic                                            |
| 64 | Q9X8L6 | DNA integrity scanning protein DisA                  | OUT     | OUT     | SCO3352 | disA      | Unknown                                                                                                                                                                                                                                                                                                                                                           | Cytoplasmic                                            |
| 65 | Q9ZEP4 | Transcriptional regulatory protein CseB              | -       | OUT     | SCO3358 | cseB      | Unknown                                                                                                                                                                                                                                                                                                                                                           | Nucleoid                                               |
| 66 | Q9X913 | K(+)-insensitive pyrophosphate-energized proton pump | IN      | IN      | SCO3547 | hppA      | <ul style="list-style-type: none"> <li>•Protein families: signaling and cellular processes</li> <li>Transporters</li> </ul>                                                                                                                                                                                                                                       | Integral membrane                                      |
| 67 | Q9WVX8 | Anti-sigma-B factor antagonist                       | IN      | OUT     | SCO3549 | rsbV/bldG | <ul style="list-style-type: none"> <li>•Protein families: genetic information processing</li> <li>Transcription machinery</li> </ul>                                                                                                                                                                                                                              | Cytoplasmic                                            |
| 68 | Q9X928 | Acetyl-coenzyme A synthetase                         | OUT     | OUT     | SCO3563 | acsA      | <ul style="list-style-type: none"> <li>•Carbohydrate metabolism</li> <li>Glycolysis / Gluconeogenesis</li> <li>Pyruvate metabolism</li> <li>Glyoxylate and dicarboxylate metabolism</li> <li>Propanoate metabolism</li> <li>•Energy metabolism</li> <li>Methane metabolism</li> <li>•Protein families: metabolism</li> <li>Lipid biosynthesis proteins</li> </ul> | Peripheral inner membrane protein facing the cytoplasm |
| 69 | Q9X8R6 | Fructose-bisphosphate aldolase                       | UNKNOWN | -       | SCO3649 | fba       | <ul style="list-style-type: none"> <li>•Carbohydrate metabolism</li> <li>Glycolysis / Gluconeogenesis</li> <li>Pentose phosphate pathway</li> <li>Fructose and mannose metabolism</li> <li>•Energy metabolism</li> <li>Methane metabolism</li> </ul>                                                                                                              | Peripheral inner membrane protein facing the cytoplasm |

|    |        |                                                     |         |         |         |      |                                                                                                                                                                                                                                                                                                               |                                                        |
|----|--------|-----------------------------------------------------|---------|---------|---------|------|---------------------------------------------------------------------------------------------------------------------------------------------------------------------------------------------------------------------------------------------------------------------------------------------------------------|--------------------------------------------------------|
| 70 | Q05558 | Chaperone protein DnaK                              | UNKNOWN | OUT     | SCO3671 | dnaK | <ul style="list-style-type: none"> <li>•Folding, sorting and degradation<br/>RNA degradation</li> <li>•Protein families: genetic information processing<br/>Messenger RNA biogenesis<br/>Chaperones and folding catalysts</li> <li>•Protein families: signaling and cellular processes<br/>Exosome</li> </ul> | Peripheral inner membrane protein facing the cytoplasm |
| 71 | Q9F2I9 | Methionine--tRNA ligase                             | OUT     | OUT     | SCO3792 | metG | <ul style="list-style-type: none"> <li>•Translation<br/>Aminoacyl-tRNA biosynthesis</li> <li>•Protein families: metabolism<br/>Amino acid related enzymes</li> <li>•Protein families: genetic information processing<br/>Transfer RNA biogenesis</li> </ul>                                                   | Cytoplasmic                                            |
| 72 | Q9F323 | Aspartate--tRNA ligase                              | OUT     | UNKNOWN | SCO3795 | aspS | <ul style="list-style-type: none"> <li>•Translation<br/>Aminoacyl-tRNA biosynthesis</li> <li>•Protein families: metabolism<br/>Amino acid related enzymes</li> <li>•Protein families: genetic information processing<br/>Transfer RNA biogenesis</li> </ul>                                                   | Peripheral inner membrane protein facing the cytoplasm |
| 73 | Q9S2C0 | Serine/threonine-protein kinase PksC                | UNKNOWN | -       | SCO3821 | pksC | <ul style="list-style-type: none"> <li>•Protein families: metabolism<br/>Protein kinases</li> </ul>                                                                                                                                                                                                           | Integral membrane                                      |
| 74 | Q9XA16 | Probable serine/threonine-protein kinase<br>SCO3848 | IN      | IN      | SCO3848 | /    | <ul style="list-style-type: none"> <li>•Protein families: metabolism<br/>Protein kinases</li> </ul>                                                                                                                                                                                                           | Integral membrane                                      |
| 75 | P35885 | DNA gyrase subunit A                                | IN      | UNKNOWN | SCO3873 | gyrA | <ul style="list-style-type: none"> <li>•Protein families: genetic information processing<br/>DNA replication proteins<br/>DNA repair and recombination proteins</li> </ul>                                                                                                                                    | Cytoplasmic                                            |

|    |        |                                       |         |     |         |       |                                                                                                                                                                                                                                                                                                           |                                                        |
|----|--------|---------------------------------------|---------|-----|---------|-------|-----------------------------------------------------------------------------------------------------------------------------------------------------------------------------------------------------------------------------------------------------------------------------------------------------------|--------------------------------------------------------|
| 76 | P35886 | DNA gyrase subunit B                  | IN      | OUT | SCO3874 | gyrB  | <ul style="list-style-type: none"> <li>•Protein families: genetic information processing</li> <li>DNA replication proteins</li> <li>DNA repair and recombination proteins</li> </ul>                                                                                                                      | Peripheral inner membrane protein facing the cytoplasm |
| 77 | P27903 | Beta sliding clamp                    | OUT     | OUT | SCO3878 | dnaN  | <ul style="list-style-type: none"> <li>•Replication and repair</li> <li>DNA replication</li> <li>Mismatch repair</li> <li>Homologous recombination</li> <li>•Protein families: genetic information processing</li> <li>DNA replication proteins</li> <li>DNA repair and recombination proteins</li> </ul> | Cytoplasmic                                            |
| 78 | O54569 | Membrane protein insertase YidC       | IN      | IN  | SCO3883 | yidC  | <ul style="list-style-type: none"> <li>•Folding, sorting and degradation</li> <li>Protein export</li> <li>•Membrane transport</li> <li>Bacterial secretion system</li> <li>•Cellular community - prokaryotes</li> <li>Quorum sensing</li> </ul>                                                           | Integral membrane                                      |
| 79 | Q9X8U3 | Single-stranded DNA-binding protein 2 | IN      | IN  | SCO3907 | ssb2  | <ul style="list-style-type: none"> <li>•Replication and repair</li> <li>DNA replication</li> <li>Mismatch repair</li> <li>Homologous recombination</li> <li>•Protein families: genetic information processing</li> <li>DNA replication proteins</li> <li>DNA repair and recombination proteins</li> </ul> | Nucleoid                                               |
| 80 | P66470 | 30S ribosomal protein S18 1           | UNKNOWN | -   | SCO3908 | rpsR1 | <ul style="list-style-type: none"> <li>•Translation</li> <li>Ribosome</li> <li>•Protein families: genetic information processing</li> <li>Ribosome</li> </ul>                                                                                                                                             | Ribosomal                                              |
| 81 | Q53868 | Uncharacterized protein SCO3922       | IN      | -   | SCO3922 | /     | Unknown                                                                                                                                                                                                                                                                                                   | Integral membrane                                      |

|    |        |                                                           |     |     |         |           |                                                                                                                                                                                                                                                                                                                                                                                                                                                                                                                                                                                                                                       |                                                        |
|----|--------|-----------------------------------------------------------|-----|-----|---------|-----------|---------------------------------------------------------------------------------------------------------------------------------------------------------------------------------------------------------------------------------------------------------------------------------------------------------------------------------------------------------------------------------------------------------------------------------------------------------------------------------------------------------------------------------------------------------------------------------------------------------------------------------------|--------------------------------------------------------|
| 82 | Q53867 | Uncharacterized protein SCO3923                           | OUT | -   | SCO3923 | /         | Unknown                                                                                                                                                                                                                                                                                                                                                                                                                                                                                                                                                                                                                               | Cytoplasmic                                            |
| 83 | Q9ZBY8 | Putative phenylalanine aminotransferase                   | -   | OUT | SCO3944 | pat/hisC2 | <ul style="list-style-type: none"> <li>•Amino acid metabolism</li> <li style="padding-left: 20px;">Histidine metabolism</li> <li style="padding-left: 20px;">Tyrosine metabolism</li> <li style="padding-left: 20px;">Phenylalanine metabolism</li> <li style="padding-left: 20px;">Phenylalanine, tyrosine and tryptophan biosynthesis</li> <li>•Biosynthesis of other secondary metabolites</li> <li style="padding-left: 20px;">Novobiocin biosynthesis</li> <li>•Protein families: metabolism</li> <li style="padding-left: 20px;">Amino acid related enzymes</li> </ul>                                                          | Cytoplasmic                                            |
| 84 | Q9ZBX1 | Serine--tRNA ligase                                       | -   | OUT | SCO3961 | serS      | <ul style="list-style-type: none"> <li>•Translation</li> <li style="padding-left: 20px;">Aminoacyl-tRNA biosynthesis</li> <li>•Protein families: metabolism</li> <li style="padding-left: 20px;">Amino acid related enzymes</li> <li>•Protein families: genetic information processing</li> <li style="padding-left: 20px;">Transfer RNA biogenesis</li> </ul>                                                                                                                                                                                                                                                                        | Integral membrane                                      |
| 85 | Q9KZV0 | Mycothioli acetyltransferase                              | IN  | -   | SCO4151 | mshD      | Unknown                                                                                                                                                                                                                                                                                                                                                                                                                                                                                                                                                                                                                               | Cytoplasmic                                            |
| 86 | P33158 | 2,3-bisphosphoglycerate-dependent phosphoglycerate mutase | OUT | OUT | SCO4209 | gpmA      | <ul style="list-style-type: none"> <li>•Carbohydrate metabolism</li> <li style="padding-left: 20px;">Glycolysis / Gluconeogenesis</li> <li style="padding-left: 40px;">•Energy metabolism</li> <li style="padding-left: 60px;">Methane metabolism</li> <li style="padding-left: 40px;">•Amino acid metabolism</li> <li style="padding-left: 20px;">Glycine, serine and threonine metabolism</li> <li>•Protein families: genetic information processing</li> <li style="padding-left: 20px;">Membrane trafficking</li> <li>•Protein families: signaling and cellular processes</li> <li style="padding-left: 20px;">Exosome</li> </ul> | Peripheral inner membrane protein facing the cytoplasm |

|    |        |                                                    |         |     |         |       |                                                                                                                                                                                                                                                                                                               |                                                        |
|----|--------|----------------------------------------------------|---------|-----|---------|-------|---------------------------------------------------------------------------------------------------------------------------------------------------------------------------------------------------------------------------------------------------------------------------------------------------------------|--------------------------------------------------------|
| 87 | Q9KXU5 | 60 kDa chaperonin 2                                | OUT     | OUT | SCO4296 | groL2 | <ul style="list-style-type: none"> <li>•Folding, sorting and degradation<br/>RNA degradation</li> <li>•Protein families: genetic information processing<br/>Messenger RNA biogenesis<br/>Chaperones and folding catalysts</li> <li>•Protein families: signaling and cellular processes<br/>Exosome</li> </ul> | Peripheral inner membrane protein facing the cytoplasm |
| 88 | Q9XAQ7 | NADH-quinone oxidoreductase subunit D <sub>2</sub> | OUT     | IN  | SCO4565 | nuoD2 | <ul style="list-style-type: none"> <li>•Energy metabolism<br/>Oxidative phosphorylation</li> </ul>                                                                                                                                                                                                            | Peripheral inner membrane protein facing the cytoplasm |
| 89 | Q9XAQ9 | NADH-quinone oxidoreductase subunit F              | IN      | OUT | SCO4567 | nuoF  | <ul style="list-style-type: none"> <li>•Energy metabolism<br/>Oxidative phosphorylation</li> </ul>                                                                                                                                                                                                            | Peripheral inner membrane protein facing the cytoplasm |
| 90 | Q9XAR0 | NADH-quinone oxidoreductase subunit G              | UNKNOWN | -   | SCO4568 | nuoG  | <ul style="list-style-type: none"> <li>•Energy metabolism<br/>Oxidative phosphorylation</li> </ul>                                                                                                                                                                                                            | Peripheral inner membrane protein facing the cytoplasm |
| 91 | Q9XAR1 | NADH-quinone oxidoreductase subunit H              | IN      | -   | SCO4569 | nuoH  | <ul style="list-style-type: none"> <li>•Energy metabolism<br/>Oxidative phosphorylation</li> </ul>                                                                                                                                                                                                            | Integral membrane                                      |
| 92 | Q9XAR5 | NADH-quinone oxidoreductase subunit L              | IN      | IN  | SCO4573 | nuoL  | <ul style="list-style-type: none"> <li>•Energy metabolism<br/>Oxidative phosphorylation</li> </ul>                                                                                                                                                                                                            | Integral membrane                                      |
| 93 | Q9F2V2 | Protease HtpX homolog 2                            | UNKNOWN | -   | SCO4609 | htpX2 | <ul style="list-style-type: none"> <li>•Protein families: metabolism<br/>Peptidases</li> </ul>                                                                                                                                                                                                                | Integral membrane                                      |
| 94 | Q9F2U7 | UPF0234 protein SCO4614                            | IN      | -   | SCO4614 | /     | <ul style="list-style-type: none"> <li>•Unclassified: signaling and cellular processes<br/>Signaling proteins</li> </ul>                                                                                                                                                                                      | Nucleoid                                               |

|     |        |                                           |         |         |         |      |                                                                                                                                                                                                                                                                                                                                        |                                                        |
|-----|--------|-------------------------------------------|---------|---------|---------|------|----------------------------------------------------------------------------------------------------------------------------------------------------------------------------------------------------------------------------------------------------------------------------------------------------------------------------------------|--------------------------------------------------------|
| 95  | P0A4G8 | Protein translocase subunit SecE          | OUT     | IN      | SCO4646 | secE | <ul style="list-style-type: none"> <li>•Folding, sorting and degradation</li> <li>Protein export</li> <li>•Membrane transport</li> <li>Bacterial secretion system</li> <li>•Cellular community - prokaryotes</li> <li>Quorum sensing</li> <li>•Protein families: signaling and cellular processes</li> <li>Secretion system</li> </ul> | Integral membrane                                      |
| 96  | P48950 | 50S ribosomal protein L1                  | -       | OUT     | SCO4649 | rplA | <ul style="list-style-type: none"> <li>•Translation</li> <li>Ribosome</li> <li>•Protein families: genetic information processing</li> <li>Ribosome</li> </ul>                                                                                                                                                                          | Ribosomal                                              |
| 97  | P41109 | Putative lipoprotein SCO4651              | OUT     | -       | SCO4651 | /    | Unknown                                                                                                                                                                                                                                                                                                                                | Secreted Lipoprotein                                   |
| 98  | Q9L0L0 | DNA-directed RNA polymerase subunit beta  | OUT     | OUT     | SCO4654 | rpoB | <ul style="list-style-type: none"> <li>•Transcription</li> <li>RNA polymerase</li> <li>•Protein families: genetic information processing</li> <li>Transcription machinery</li> <li>DNA repair and recombination proteins</li> </ul>                                                                                                    | Peripheral inner membrane protein facing the cytoplasm |
| 99  | Q8CJT1 | DNA-directed RNA polymerase subunit beta' | OUT     | UNKNOWN | SCO4655 | rpoC | <ul style="list-style-type: none"> <li>•Transcription</li> <li>RNA polymerase</li> <li>•Protein families: genetic information processing</li> <li>Transcription machinery</li> <li>DNA repair and recombination proteins</li> </ul>                                                                                                    | Cytoplasmic                                            |
| 100 | P0A4A3 | 30S ribosomal protein S12                 | UNKNOWN | OUT     | SCO4659 | rpsL | <ul style="list-style-type: none"> <li>•Translation</li> <li>Ribosome</li> <li>•Protein families: genetic information processing</li> <li>Ribosome</li> </ul>                                                                                                                                                                          | Ribosomal                                              |



|     |        |                           |         |         |         |      |                                                                                                                                                                                              |                                                        |
|-----|--------|---------------------------|---------|---------|---------|------|----------------------------------------------------------------------------------------------------------------------------------------------------------------------------------------------|--------------------------------------------------------|
| 101 | Q9L0K4 | 30S ribosomal protein S7  | UNKNOWN | UNKNOWN | SCO4660 | rspG | <ul style="list-style-type: none"> <li>•Translation Ribosome</li> <li>•Protein families: genetic information processing Ribosome</li> </ul>                                                  | Ribosomal                                              |
| 102 | P40173 | Elongation factor G 1     | -       | OUT     | SCO4661 | fusA | <ul style="list-style-type: none"> <li>•Protein families: genetic information processing Translation factors</li> </ul>                                                                      | Peripheral inner membrane protein facing the cytoplasm |
| 103 | P40174 | Elongation factor Tu-1    | UNKNOWN | UNKNOWN | SCO4662 | tufI | <ul style="list-style-type: none"> <li>•Protein families: genetic information processing Translation factors</li> <li>•Protein families: signaling and cellular processes Exosome</li> </ul> | Peripheral inner membrane protein facing the cytoplasm |
| 104 | P66337 | 30S ribosomal protein S10 | OUT     | OUT     | SCO4701 | rpsJ | <ul style="list-style-type: none"> <li>•Translation Ribosome</li> <li>•Protein families: genetic information processing Ribosome</li> </ul>                                                  | Ribosomal                                              |
| 105 | Q9L0E0 | 50S ribosomal protein L3  | OUT     | OUT     | SCO4702 | rplC | <ul style="list-style-type: none"> <li>•Translation Ribosome</li> <li>•Protein families: genetic information processing Ribosome</li> </ul>                                                  | Ribosomal                                              |
| 106 | Q9L0D9 | 50S ribosomal protein L4  | OUT     | OUT     | SCO4703 | rplD | <ul style="list-style-type: none"> <li>•Translation Ribosome</li> <li>•Protein families: genetic information processing Ribosome</li> </ul>                                                  | Ribosomal                                              |
| 107 | Q9L0D7 | 50S ribosomal protein L2  | OUT     | OUT     | SCO4705 | rplB | <ul style="list-style-type: none"> <li>•Translation Ribosome</li> <li>•Protein families: genetic information processing Ribosome</li> </ul>                                                  | Ribosomal                                              |

|     |        |                           |         |         |         |      |                                                                                                                                             |           |
|-----|--------|---------------------------|---------|---------|---------|------|---------------------------------------------------------------------------------------------------------------------------------------------|-----------|
| 108 | Q9L0D6 | 30S ribosomal protein S19 | UNKNOWN | OUT     | SCO4706 | rpsS | <ul style="list-style-type: none"> <li>•Translation Ribosome</li> <li>•Protein families: genetic information processing Ribosome</li> </ul> | Ribosomal |
| 109 | Q9L0D5 | 50S ribosomal protein L22 | OUT     | OUT     | SCO4707 | rpIV | <ul style="list-style-type: none"> <li>•Translation Ribosome</li> <li>•Protein families: genetic information processing Ribosome</li> </ul> | Ribosomal |
| 110 | Q9L0D4 | 30S ribosomal protein S3  | UNKNOWN | UNKNOWN | SCO4708 | rpsC | <ul style="list-style-type: none"> <li>•Translation Ribosome</li> <li>•Protein families: genetic information processing Ribosome</li> </ul> | Ribosomal |
| 111 | Q9L0D3 | 50S ribosomal protein L16 | IN      | OUT     | SCO4709 | rpIP | <ul style="list-style-type: none"> <li>•Translation Ribosome</li> <li>•Protein families: genetic information processing Ribosome</li> </ul> | Ribosomal |
| 112 | Q9L0D0 | 50S ribosomal protein L14 | OUT     | UNKNOWN | SCO4712 | rpIN | <ul style="list-style-type: none"> <li>•Translation Ribosome</li> <li>•Protein families: genetic information processing Ribosome</li> </ul> | Ribosomal |
| 113 | Q9L0C9 | 50S ribosomal protein L24 | -       | UNKNOWN | SCO4713 | rpIX | <ul style="list-style-type: none"> <li>•Translation Ribosome</li> <li>•Protein families: genetic information processing Ribosome</li> </ul> | Ribosomal |
| 114 | Q9L0C8 | 50S ribosomal protein L5  | UNKNOWN | UNKNOWN | SCO4714 | rpIE | <ul style="list-style-type: none"> <li>•Translation Ribosome</li> <li>•Protein families: genetic information processing Ribosome</li> </ul> | Ribosomal |

|     |        |                                  |     |         |         |      |                                                                                                                                                                                                                                                 |                   |
|-----|--------|----------------------------------|-----|---------|---------|------|-------------------------------------------------------------------------------------------------------------------------------------------------------------------------------------------------------------------------------------------------|-------------------|
| 115 | P66417 | 30S ribosomal protein S14 type Z | IN  | IN      | SCO4715 | rpsZ | <ul style="list-style-type: none"> <li>•Translation</li> <li>Ribosome</li> <li>•Protein families: genetic information processing</li> <li>Ribosome</li> </ul>                                                                                   | Ribosomal         |
| 116 | P49399 | 30S ribosomal protein S8         | OUT | OUT     | SCO4716 | rpsH | <ul style="list-style-type: none"> <li>•Translation</li> <li>Ribosome</li> <li>•Protein families: genetic information processing</li> <li>Ribosome</li> </ul>                                                                                   | Ribosomal         |
| 117 | P46786 | 50S ribosomal protein L6         | OUT | IN      | SCO4717 | rplF | <ul style="list-style-type: none"> <li>•Translation</li> <li>Ribosome</li> <li>•Protein families: genetic information processing</li> <li>Ribosome</li> </ul>                                                                                   | Ribosomal         |
| 118 | P46788 | 50S ribosomal protein L18        | OUT | -       | SCO4718 | rplR | <ul style="list-style-type: none"> <li>•Translation</li> <li>Ribosome</li> <li>•Protein families: genetic information processing</li> <li>Ribosome</li> </ul>                                                                                   | Ribosomal         |
| 119 | P46790 | 30S ribosomal protein S5         | OUT | UNKNOWN | SCO4719 | rpsE | <ul style="list-style-type: none"> <li>•Translation</li> <li>Ribosome</li> <li>•Protein families: genetic information processing</li> <li>Ribosome</li> </ul>                                                                                   | Ribosomal         |
| 120 | P46787 | 50S ribosomal protein L15        | OUT | OUT     | SCO4721 | rplO | <ul style="list-style-type: none"> <li>•Translation</li> <li>Ribosome</li> <li>•Protein families: genetic information processing</li> <li>Ribosome</li> </ul>                                                                                   | Ribosomal         |
| 121 | P46785 | Protein translocase subunit SecY | IN  | IN      | SCO4722 | secY | <ul style="list-style-type: none"> <li>•Folding, sorting and degradation</li> <li>Protein export</li> <li>•Membrane transport</li> <li>Bacterial secretion system</li> <li>•Cellular community - prokaryotes</li> <li>Quorum sensing</li> </ul> | Integral membrane |

|     |        |                                           |         |         |         |      |                                                                                                                                                                                                                                                                     |                                                                  |
|-----|--------|-------------------------------------------|---------|---------|---------|------|---------------------------------------------------------------------------------------------------------------------------------------------------------------------------------------------------------------------------------------------------------------------|------------------------------------------------------------------|
| 122 | P43414 | Adenylate kinase                          | OUT     | -       | SCO4723 | adk  | <ul style="list-style-type: none"> <li>•Nucleotide metabolism</li> <li>  Purine metabolism</li> <li>•Metabolism of cofactors and vitamins</li> <li>  Thiamine metabolism</li> <li>•Protein families: signaling and cellular processes</li> <li>  Exosome</li> </ul> | Peripheral inner membrane protein facing the cytoplasm           |
| 123 | O86773 | 30S ribosomal protein S13                 | OUT     | OUT     | SCO4727 | rpsM | <ul style="list-style-type: none"> <li>•Translation</li> <li>  Ribosome</li> <li>•Protein families: genetic information processing</li> <li>  Ribosome</li> </ul>                                                                                                   | Ribosomal                                                        |
| 124 | P72403 | 30S ribosomal protein S11                 | OUT     | OUT     | SCO4728 | rpsK | <ul style="list-style-type: none"> <li>•Translation</li> <li>  Ribosome</li> <li>•Protein families: genetic information processing</li> <li>  Ribosome</li> </ul>                                                                                                   | Ribosomal                                                        |
| 125 | P60312 | DNA-directed RNA polymerase subunit alpha | -       | OUT     | SCO4729 | rpoA | <ul style="list-style-type: none"> <li>•Transcription</li> <li>  RNA polymerase</li> <li>•Protein families: genetic information processing</li> <li>  Transcription machinery</li> <li>  DNA repair and recombination proteins</li> </ul>                           | Peripheral inner membrane protein facing the cytoplasm, Nucleoid |
| 126 | O86775 | 50S ribosomal protein L17                 | UNKNOWN | IN      | SCO4730 | rplQ | <ul style="list-style-type: none"> <li>•Translation</li> <li>  Ribosome</li> <li>•Protein families: genetic information processing</li> <li>  Ribosome</li> </ul>                                                                                                   | Ribosomal                                                        |
| 127 | Q53874 | 50S ribosomal protein L13                 | UNKNOWN | UNKNOWN | SCO4734 | rplM | <ul style="list-style-type: none"> <li>•Translation</li> <li>  Ribosome</li> <li>•Protein families: genetic information processing</li> <li>  Ribosome</li> </ul>                                                                                                   | Ribosomal                                                        |

|     |        |                                                    |     |     |         |       |                                                                                                                                                                                                                                                                                               |                                                        |
|-----|--------|----------------------------------------------------|-----|-----|---------|-------|-----------------------------------------------------------------------------------------------------------------------------------------------------------------------------------------------------------------------------------------------------------------------------------------------|--------------------------------------------------------|
| 128 | Q53875 | 30S ribosomal protein S9                           | OUT | OUT | SCO4735 | rpsI  | <ul style="list-style-type: none"> <li>•Translation Ribosome</li> <li>•Protein families: genetic information processing Ribosome</li> </ul>                                                                                                                                                   | Ribosomal                                              |
| 129 | P40171 | 60 kDa chaperonin 1                                | OUT | OUT | SCO4762 | groL1 | <ul style="list-style-type: none"> <li>•Folding, sorting and degradation RNA degradation</li> <li>•Protein families: genetic information processing Messenger RNA biogenesis Chaperones and folding catalysts</li> <li>•Protein families: signaling and cellular processes Exosome</li> </ul> | Peripheral inner membrane protein facing the cytoplasm |
| 130 | Q9KY56 | Succinate--CoA ligase [ADP-forming] subunit beta 1 | OUT | OUT | SCO4808 | sucC1 | <ul style="list-style-type: none"> <li>•Carbohydrate metabolism Citrate cycle (TCA cycle) Propanoate metabolism C5-Branched dibasic acid metabolism</li> </ul>                                                                                                                                | Peripheral inner membrane protein facing the cytoplasm |
| 131 | Q9K3J3 | Malate dehydrogenase                               | OUT | OUT | SCO4827 | mdh   | <ul style="list-style-type: none"> <li>•Carbohydrate metabolism Citrate cycle (TCA cycle) Pyruvate metabolism Glyoxylate and dicarboxylate metabolism</li> <li>•Energy metabolism Methane metabolism</li> <li>• Amino acid metabolism Cysteine and methionine metabolism</li> </ul>           | Cytoplasmic                                            |

|     |        |                                                    |         |         |         |         |                                                                                                                                                                                                                                                                                                           |                                                        |
|-----|--------|----------------------------------------------------|---------|---------|---------|---------|-----------------------------------------------------------------------------------------------------------------------------------------------------------------------------------------------------------------------------------------------------------------------------------------------------------|--------------------------------------------------------|
| 132 | Q04943 | Signal transduction histidine-protein kinase AfsQ2 | OUT     | -       | SCO4906 | afsQ2   | <ul style="list-style-type: none"> <li>•Signal transduction</li> <li>Two-component system</li> <li>•Protein families: metabolism</li> <li>Protein kinases</li> <li>•Protein families: signaling and cellular processes</li> <li>Two-component system</li> </ul>                                           | Integral membrane                                      |
| 133 | Q04942 | Transcriptional regulatory protein AfsQ1           | OUT     | OUT     | SCO4907 | afsQ1   | Unknown                                                                                                                                                                                                                                                                                                   | Nucleoid                                               |
| 134 | P46105 | Probable actinorhodin transporter                  | UNKNOWN | IN      | SCO5083 | actII-2 | Unknown                                                                                                                                                                                                                                                                                                   | Integral membrane                                      |
| 135 | Q53902 | Putative membrane protein ActII-3                  | UNKNOWN | IN      | SCO5084 | actII-3 | Unknown                                                                                                                                                                                                                                                                                                   | Integral membrane                                      |
| 136 | P16544 | Putative ketoacyl reductase                        | OUT     | -       | SCO5086 | actIII  | <ul style="list-style-type: none"> <li>•Metabolism of terpenoids and polyketides</li> <li>Biosynthesis of type II polyketide backbone</li> <li>Tetracycline biosynthesis</li> <li>•Protein families: metabolism</li> <li>Lipid biosynthesis proteins</li> <li>Polyketide biosynthesis proteins</li> </ul> | Cytoplasmic                                            |
| 137 | Q9FCI4 | UPF0182 protein SCO5204                            | IN      | IN      | SCO5204 | /       | Unknown                                                                                                                                                                                                                                                                                                   | Integral membrane                                      |
| 138 | Q7AKG9 | ECF RNA polymerase sigma factor SigR               | IN      | -       | SCO5216 | sigR    | <ul style="list-style-type: none"> <li>•Protein families: genetic information processing</li> <li>Transcription machinery</li> </ul>                                                                                                                                                                      | Cytoplasmic                                            |
| 139 | P0A302 | ATP synthase protein I                             | -       | IN      | SCO5366 | atpI    | <ul style="list-style-type: none"> <li>•Protein families: metabolism</li> <li>Photosynthesis proteins</li> </ul>                                                                                                                                                                                          | Integral membrane                                      |
| 140 | Q9K4D7 | ATP synthase subunit b                             | IN      | UNKNOWN | SCO5369 | atpF    | <ul style="list-style-type: none"> <li>•Energy metabolism</li> <li>Oxidative phosphorylation</li> </ul>                                                                                                                                                                                                   | Integral membrane                                      |
| 141 | Q9K4D6 | ATP synthase subunit delta                         | IN      | -       | SCO5370 | atpH    | <ul style="list-style-type: none"> <li>•Energy metabolism</li> <li>Oxidative phosphorylation</li> </ul>                                                                                                                                                                                                   | Peripheral inner membrane protein facing the cytoplasm |

|     |        |                                        |         |         |         |       |                                                                                                                                                                                                                                                                                                                                           |                                                        |
|-----|--------|----------------------------------------|---------|---------|---------|-------|-------------------------------------------------------------------------------------------------------------------------------------------------------------------------------------------------------------------------------------------------------------------------------------------------------------------------------------------|--------------------------------------------------------|
| 142 | Q9K4D5 | ATP synthase subunit alpha             | IN      | UNKNOWN | SCO5371 | atpA  | <ul style="list-style-type: none"> <li>•Energy metabolism</li> <li>Oxidative phosphorylation</li> </ul>                                                                                                                                                                                                                                   | Peripheral inner membrane protein facing the cytoplasm |
| 143 | Q9K4D4 | ATP synthase gamma chain               | IN      | -       | SCO5372 | atpG  | <ul style="list-style-type: none"> <li>•Energy metabolism</li> <li>Oxidative phosphorylation</li> </ul>                                                                                                                                                                                                                                   | Peripheral inner membrane protein facing the cytoplasm |
| 144 | P0A300 | ATP synthase subunit beta              | IN      | UNKNOWN | SCO5373 | atpD  | <ul style="list-style-type: none"> <li>•Energy metabolism</li> <li>Oxidative phosphorylation</li> </ul>                                                                                                                                                                                                                                   | Peripheral inner membrane protein facing the cytoplasm |
| 145 | P0A2Z6 | ATP synthase epsilon chain             | IN      | -       | SCO5374 | atpC  | <ul style="list-style-type: none"> <li>•Energy metabolism</li> <li>Oxidative phosphorylation</li> </ul>                                                                                                                                                                                                                                   | Peripheral inner membrane protein facing the cytoplasm |
| 146 | Q9Z585 | DNA ligase 1                           | OUT     | -       | SCO5494 | ligA1 | <ul style="list-style-type: none"> <li>•Replication and repair</li> <li>DNA replication</li> <li>Base excision repair</li> <li>Nucleotide excision repair</li> <li>Mismatch repair</li> <li>•Protein families: genetic information processing</li> <li>DNA replication proteins</li> <li>DNA repair and recombination proteins</li> </ul> | Cytoplasmic                                            |
| 147 | Q9ZBR5 | 50S ribosomal protein L28-1            | UNKNOWN | UNKNOWN | SCO5564 | rpmB1 | <ul style="list-style-type: none"> <li>•Translation</li> <li>Ribosome</li> <li>•Protein families: genetic information processing</li> <li>Ribosome</li> </ul>                                                                                                                                                                             | Ribosomal                                              |
| 148 | Q9ZBR1 | Phosphopantetheine adenylyltransferase | -       | OUT     | SCO5568 | coaD  | <ul style="list-style-type: none"> <li>•Metabolism of cofactors and vitamins</li> <li>Pantothenate and CoA biosynthesis</li> </ul>                                                                                                                                                                                                        | Cytoplasmic                                            |

|     |        |                                             |         |         |         |       |                                                                                                                                                                  |                                                        |
|-----|--------|---------------------------------------------|---------|---------|---------|-------|------------------------------------------------------------------------------------------------------------------------------------------------------------------|--------------------------------------------------------|
| 149 | Q9ZBQ8 | 50S ribosomal protein L32-1                 | OUT     | -       | SCO5571 | rpmF1 | <ul style="list-style-type: none"> <li>•Translation Ribosome</li> <li>•Protein families: genetic information processing Ribosome</li> </ul>                      | Ribosomal                                              |
| 150 | O69879 | 30S ribosomal protein S16                   | OUT     | -       | SCO5591 | rpsP  | <ul style="list-style-type: none"> <li>•Translation Ribosome</li> <li>•Protein families: genetic information processing Ribosome</li> </ul>                      | Ribosomal                                              |
| 151 | P0A477 | 50S ribosomal protein L19                   | IN      | IN      | SCO5595 | rplS  | <ul style="list-style-type: none"> <li>•Translation Ribosome</li> <li>•Protein families: genetic information processing Ribosome</li> </ul>                      | Ribosomal                                              |
| 152 | O31212 | 30S ribosomal protein S2                    | OUT     | UNKNOWN | SCO5624 | rpsB  | <ul style="list-style-type: none"> <li>•Translation Ribosome</li> <li>•Protein families: genetic information processing Ribosome</li> </ul>                      | Ribosomal                                              |
| 153 | O86770 | Ribosome-recycling factor                   | UNKNOWN | -       | SCO5627 | frr   | <ul style="list-style-type: none"> <li>•Protein families: genetic information processing Translation factors</li> </ul>                                          | Peripheral inner membrane protein facing the cytoplasm |
| 154 | O86751 | Fe(3+) ions import ATP-binding protein FbpC | IN      | -       | SCO5648 | fbpC  | <ul style="list-style-type: none"> <li>•Membrane transport ABC transporters</li> <li>•Protein families: signaling and cellular processes Transporters</li> </ul> | Peripheral inner membrane protein facing the cytoplasm |
| 155 | Q9KYS0 | Putative zinc metalloprotease SCO5695       | UNKNOWN | IN      | SCO5695 | /     | Unknown                                                                                                                                                          | Integral membrane                                      |
| 156 | Q8CJQ8 | Translation initiation factor IF-2          | OUT     | -       | SCO5706 | infB  | <ul style="list-style-type: none"> <li>•Protein families: genetic information processing Translation factors</li> </ul>                                          | Cytoplasmic                                            |



|     |        |                                                |         |     |         |           |                                                                                                                                                                                                                   |                   |
|-----|--------|------------------------------------------------|---------|-----|---------|-----------|-------------------------------------------------------------------------------------------------------------------------------------------------------------------------------------------------------------------|-------------------|
| 157 | O86655 | 30S ribosomal protein S15                      | IN      | IN  | SCO5736 | rpsO      | <ul style="list-style-type: none"> <li>•Translation Ribosome</li> <li>•Protein families: genetic information processing Ribosome</li> </ul>                                                                       | Ribosomal         |
| 158 | Q8CJQ6 | Polyribonucleotide nucleotidyltransferase      | OUT     | OUT | SCO5737 | pnp       | <ul style="list-style-type: none"> <li>•Folding, sorting and degradation RNA degradation</li> <li>•Protein families: genetic information processing Messenger RNA biogenesis Transfer RNA biogenesis</li> </ul>   | Cytoplasmic       |
| 159 | O86841 | 4-hydroxy-tetrahydrodipicolinate synthase 2    | OUT     | -   | SCO5744 | dapA2     | <ul style="list-style-type: none"> <li>•Amino acid metabolism Lysine biosynthesis</li> <li>•Biosynthesis of other secondary metabolites Monobactam biosynthesis</li> </ul>                                        | Cytoplasmic       |
| 160 | O69981 | Vitamin B12-dependent ribonucleotide reductase | -       | OUT | SCO5805 | nrdJ      | <ul style="list-style-type: none"> <li>•Nucleotide metabolism Purine metabolism Pyrimidine metabolism</li> <li>•Protein families: genetic information processing DNA repair and recombination proteins</li> </ul> | Cytoplasmic       |
| 161 | P18183 | RNA polymerase principal sigma factor HrdB     | IN      | -   | SCO5820 | hrdB      | <ul style="list-style-type: none"> <li>•Protein families: genetic information processing Transcription machinery</li> </ul>                                                                                       | Cytoplasmic       |
| 162 | P0A4I1 | Transcriptional regulatory protein CutR        | UNKNOWN | IN  | SCO5862 | cutR      | Unknown                                                                                                                                                                                                           | Nucleoid          |
| 163 | P0A4I7 | Sensor protein CutS                            | IN      | IN  | SCO5863 | cutS      | Unknown                                                                                                                                                                                                           | Integral membrane |
| 164 | Q93JF1 | Ornithine carbamoyltransferase                 | -       | OUT | SCO5976 | argF/arcB | <ul style="list-style-type: none"> <li>•Amino acid metabolism Arginine biosynthesis</li> </ul>                                                                                                                    | Cytoplasmic       |

|     |        |                                            |    |     |         |       |                                                                                                                                                                                                                                   |                   |
|-----|--------|--------------------------------------------|----|-----|---------|-------|-----------------------------------------------------------------------------------------------------------------------------------------------------------------------------------------------------------------------------------|-------------------|
| 165 | Q9FC36 | Undecaprenyl-diphosphatase 1               | IN | -   | SCO7047 | uppP1 | <ul style="list-style-type: none"> <li>•Glycan biosynthesis and metabolism</li> <li>  Peptidoglycan biosynthesis</li> <li>•Protein families: metabolism</li> <li>  Peptidoglycan biosynthesis and degradation proteins</li> </ul> | Integral membrane |
| 166 | Q9FBT8 | Ketol-acid reductoisomerase (NADP(+))<br>2 | -  | OUT | SCO7154 | ilvC2 | <ul style="list-style-type: none"> <li>•Amino acid metabolism</li> <li>  Valine, leucine and isoleucine biosynthesis</li> <li>•Metabolism of cofactors and vitamins</li> <li>  Pantothenate and CoA biosynthesis</li> </ul>       | Cytoplasmic       |

**Table S3:** Results of targeted metabolomics from LC-MS/MS analysis of *S. coelicolor* MVs. Reported are compound name, KEGG ID, functional classification and abundance profile of identified metabolites.

| Metabolites                       | KEGG ID | Functional Class                      | F3 MVs (ppm) | F4 MVs (ppm) | F3 MVs Vs F4 MVs fold change <sup>a</sup> |
|-----------------------------------|---------|---------------------------------------|--------------|--------------|-------------------------------------------|
| Phenylalanine                     | C00079  | amino acids and amino acid precursors | 0.049        | 0.0138       | 3.6                                       |
| 2-Dehydro-3-Deoxyphosphoheptonate | C04691  | amino acids and amino acid precursors | 0.12805      | 0.122        | 1                                         |
| 6-Phosphogluconate                | C04442  | components of carbon metabolism       | 0.0045       | 0.0046       | 1                                         |
| Acetyl Coa                        | C00024  | components of carbon metabolism       | 0.0085       | 0.0101       | 0.8                                       |
| Actinorhodin                      | C06691  | antibiotics                           | 0.1599       | 0.0772       | 2.1                                       |
| Adenosine                         | C00212  | components of purine metabolism       | 0.20605      | 0.25795      | 0.8                                       |
| Arginine                          | C00062  | amino acids and amino acid precursors | 0.00075      | 0.00105      | 0.7                                       |

|                      |        |                                       |         |         |     |
|----------------------|--------|---------------------------------------|---------|---------|-----|
| Aspartic Acid        | C00049 | amino acids and amino acid precursors | 0.0917  | 0.08535 | 1.1 |
| Biotin               | C00120 | vitamins                              | 0.017   | 0.0189  | 0.9 |
| CMP                  | C00055 | components of pyrimidine metabolism   | 0.0008  | 0.00115 | 0.7 |
| D-Ribose 5-Phosphate | C00117 | components of carbon metabolism       | 0.0175  | 0.0172  | 1   |
| Folate               | C00504 | vitamins                              | 0.0095  | 0.00405 | 2.3 |
| Glucose-6-Phosphate  | C00092 | components of carbon metabolism       | 0.0645  | 0.05115 | 1.3 |
| Glutamine            | C00064 | amino acids and amino acid precursors | 0.0026  | 0.0032  | 0.8 |
| Glutamic Acid        | C00025 | amino acids and amino acid precursors | 0.017   | 0.0166  | 1   |
| GMP                  | C00144 | components of purine metabolism       | 0.00015 | 0.00025 | 0.6 |
| Histidine            | C00135 | amino acids and amino acid precursors | 0.0035  | 0.0046  | 0.8 |

|                       |        |                                       |         |         |     |
|-----------------------|--------|---------------------------------------|---------|---------|-----|
| Isoleucine            | C00407 | amino acids and amino acid precursors | 0.0245  | 0.016   | 1.5 |
| Leucine               | C00123 | amino acids and amino acid precursors | 0.0183  | 0.01025 | 1.8 |
| Lysine                | C00047 | amino acids and amino acid precursors | 0.00375 | 0.0038  | 1   |
| Malonyl Coa           | C00083 | components of carbon metabolism       | 0.00635 | 0.0081  | 0.8 |
| Methionine            | C00073 | amino acids and amino acid precursors | <0.0005 | <0.0005 | NA  |
| Ornithine             | C00077 | amino acids and amino acid precursors | 0.00415 | 0.0035  | 1.2 |
| Oxalacetate           | C00036 | components of carbon metabolism       | 0.00058 | 0.00089 | 0.7 |
| Riboflavin            | C00255 | vitamins                              | 0.01125 | 0.01515 | 0.7 |
| S-Adenosyl-Methionine | C00019 | amino acids and amino acid precursors | <0.0005 | <0.0005 | NA  |

|                                  |        |                                          |          |          |     |
|----------------------------------|--------|------------------------------------------|----------|----------|-----|
| Serine                           | C00065 | amino acids and amino acid precursors    | 0.0044   | 0.00285  | 1.5 |
| Thiamine                         | C00378 | vitamins                                 | 0.54975  | 0.59235  | 0.9 |
| Thryptophan                      | C00078 | amino acids and amino acid precursors    | 0.01525  | 0.01085  | 1.4 |
| Tyrosine                         | C00082 | amino acids and amino acid precursors    | <0.0005  | <0.0005  | NA  |
| UDP-N-Acetylmuramyl-Pentapeptide | C04702 | components of peptidoglycan biosynthesis | 0.0009   | 0.0009   | 1   |
| UMP                              | C00105 | components of pyrimidine metabolism      | 0.00095  | 0.0011   | 0.9 |
| Undecyl Prodigiosin              | C12023 | antibiotics                              | 0.00705  | 0.00515  | 1.4 |
| Valine                           | C00183 | amino acids and amino acid precursors    | 0.00445  | 0.00425  | 1   |
| Vitamin B12                      | C05776 | vitamins                                 | 0.00085  | 0.00045  | 1.9 |
| 1,3-Bisphospho-D-Glycerate       | C00236 | components of carbon metabolism          | <0.00001 | <0.00001 | NA  |

|                                        |        |                                       |          |          |    |
|----------------------------------------|--------|---------------------------------------|----------|----------|----|
| 2-Oxoglutarate                         | C00026 | components of carbon metabolism       | <0.00001 | <0.00001 | NA |
| 3-Phosphoglycerate                     | C00197 | components of carbon metabolism       | <0.00001 | <0.00001 | NA |
| 5-Phospho-Alpha-D-Ribose 1-Diphosphate | C00119 | components of carbon metabolism       | <0.00001 | <0.00001 | NA |
| Acetyl Phosphate                       | C00227 | components of carbon metabolism       | <0.00001 | <0.00001 | NA |
| Adenine                                | C00147 | components of purine metabolism       | <0.00001 | <0.00001 | NA |
| ADP                                    | C00008 | components of purine metabolism       | <0.00001 | <0.00001 | NA |
| Alanine                                | C00041 | amino acids and amino acid precursors | <0.00001 | <0.00001 | NA |
| AMP                                    | C00020 | components of purine metabolism       | <0.00001 | <0.00001 | NA |
| Anthranilate                           | C00108 | amino acids and amino acid precursors | <0.00001 | <0.00001 | NA |

|                              |        |                                       |          |          |    |
|------------------------------|--------|---------------------------------------|----------|----------|----|
| Calcium-Dependent Antibiotic | C12024 | antibiotics                           | <0.00001 | <0.00001 | NA |
| Asparagine                   | C00152 | amino acids and amino acid precursors | <0.00001 | <0.00001 | NA |
| ATP                          | C00002 | components of purine metabolism       | <0.00001 | <0.00001 | NA |
| Camp                         | C00575 | components of purine metabolism       | <0.00001 | <0.00001 | NA |
| Cgmp                         | C00942 | components of purine metabolism       | <0.00001 | <0.00001 | NA |
| Chorismate                   | C00251 | amino acids and amino acid precursors | <0.00001 | <0.00001 | NA |
| Cis-Aconitate                | C00417 | components of carbon metabolism       | <0.00001 | <0.00001 | NA |
| Citrate                      | C00158 | components of carbon metabolism       | <0.00001 | <0.00001 | NA |
| Citrulline                   | C00327 | amino acids and amino acid precursors | <0.00001 | <0.00001 | NA |



|                             |        |                                       |          |          |    |
|-----------------------------|--------|---------------------------------------|----------|----------|----|
| Coenzyme A                  | C00010 | components of carbon metabolism       | <0.00001 | <0.00001 | NA |
| CTP                         | C00063 | components of pyrimidine metabolism   | <0.00001 | <0.00001 | NA |
| FAD                         | C00016 | coenzyme                              | <0.00001 | <0.00001 | NA |
| D-Fructose 6-Phosphate      | C00085 | components of carbon metabolism       | <0.00001 | <0.00001 | NA |
| D-Fructose 1,6-Bisphosphate | C00354 | components of carbon metabolism       | <0.00001 | <0.00001 | NA |
| Fumarate                    | C00122 | components of carbon metabolism       | <0.00001 | <0.00001 | NA |
| Gamma-Butyrolactone         | C01770 | other                                 | <0.00001 | <0.00001 | NA |
| GDP                         | C00035 | components of purine metabolism       | <0.00001 | <0.00001 | NA |
| D-Glucosamine 6-Phosphate   | C00352 | amino acids and amino acid precursors | <0.00001 | <0.00001 | NA |
| Glutaconate                 | C02214 | other                                 | <0.00001 | <0.00001 | NA |

|                              |        |                                       |          |          |    |
|------------------------------|--------|---------------------------------------|----------|----------|----|
| D-Glyceraldehyde 3-Phosphate | C00118 | components of carbon metabolism       | <0.00001 | <0.00001 | NA |
| Glycine                      | C00037 | amino acids and amino acid precursors | <0.00001 | <0.00001 | NA |
| GTP                          | C00044 | components of purine metabolism       | <0.00001 | <0.00001 | NA |
| Guanine                      | C00242 | components of purine metabolism       | <0.00001 | <0.00001 | NA |
| Homocysteine                 | C00155 | amino acids and amino acid precursors | <0.00001 | <0.00001 | NA |
| IMP                          | C00130 | components of purine metabolism       | <0.00001 | <0.00001 | NA |
| Inosine                      | C00294 | components of purine metabolism       | <0.00001 | <0.00001 | NA |
| ITP                          | C00081 | components of purine metabolism       | <0.00001 | <0.00001 | NA |
| Malate                       | C00149 | components of carbon metabolism       | <0.00001 | <0.00001 | NA |

|                        |        |                                          |          |          |    |
|------------------------|--------|------------------------------------------|----------|----------|----|
| Methylmalonyl Coa      | C00083 | components of carbon metabolism          | <0.00001 | <0.00001 | NA |
| Methyl Malonate        | C02170 | components of pyrimidine metabolism      | <0.00001 | <0.00001 | NA |
| N-Acetyl-D-Glucosamine | C00140 | components of peptidoglycan biosynthesis | <0.00001 | <0.00001 | NA |
| N-Acetyl-Muramic       | C02713 | components of peptidoglycan biosynthesis | <0.00001 | <0.00001 | NA |
| NAD                    | C00003 | coenzyme                                 | <0.00001 | <0.00001 | NA |
| NADH                   | C00004 | coenzyme                                 | <0.00001 | <0.00001 | NA |
| NADPH                  | C00005 | coenzyme                                 | <0.00001 | <0.00001 | NA |
| Oxalate                | C00209 | components of purine metabolism          | <0.00001 | <0.00001 | NA |
| Oxidized Glutathione   | C00127 | other                                    | <0.00001 | <0.00001 | NA |
| Phenylpyruvate         | C00166 | amino acids and amino acid precursors    | <0.00001 | <0.00001 | NA |
| Phosphoenolpyruvate    | C00074 | components of carbon metabolism          | <0.00001 | <0.00001 | NA |

|                         |        |                                          |          |          |    |
|-------------------------|--------|------------------------------------------|----------|----------|----|
| Polyphosphate           | C00404 | other                                    | <0.00001 | <0.00001 | NA |
| Proline                 | C00148 | amino acids and amino acid precursors    | <0.00001 | <0.00001 | NA |
| Propionyl_Coa           | C00100 | other                                    | <0.00001 | <0.00001 | NA |
| Pyruvate                | C00022 | components of carbon metabolism          | <0.00001 | <0.00001 | NA |
| Reduced Glutathione     | C00051 | other                                    | <0.00001 | <0.00001 | NA |
| S-Adenosyl-Homocysteine | C00021 | amino acids and amino acid precursors    | <0.00001 | <0.00001 | NA |
| Succinate               | C00042 | components of carbon metabolism          | <0.00001 | <0.00001 | NA |
| Succinyl_Coa            | C00091 | components of carbon metabolism          | <0.00001 | <0.00001 | NA |
| UDP                     | C00015 | components of pyrimidine metabolism      | <0.00001 | <0.00001 | NA |
| UDP-Glucuronate         | C00167 | other                                    | <0.00001 | <0.00001 | NA |
| UDP-N-Acetylglucosamine | C00043 | components of peptidoglycan biosynthesis | <0.00001 | <0.00001 | NA |

|         |        |                                     |          |          |    |
|---------|--------|-------------------------------------|----------|----------|----|
| Uracil  | C00106 | components of pyrimidine metabolism | <0.00001 | <0.00001 | NA |
| Uridine | C00299 | components of pyrimidine metabolism | <0.00001 | <0.00001 | NA |
| UTP     | C00075 | components of pyrimidine metabolism | <0.00001 | <0.00001 | NA |
| Thymine | C00178 | components of pyrimidine metabolism | <0.00001 | <0.00001 | NA |

<sup>a</sup>Fold change for each metabolite was calculated by normalizing the amount of the F3 fraction to that of the F4 counterpart. NA: not applicable.

**Table S4.** Results of untargeted metabolomics from LC-MS/MS analysis of *S. coelicolor* MVs. Reported are the compound name (whenever available), and the corresponding retention time, experimental and theoretical mass value and calculated formula of identified/non-identified metabolites. ND, not determined.

|    | Compound           | t <sub>R</sub><br>(min) | Theor. Mass                  | Exp. Mass (m/z)                                                | Formula                                          |
|----|--------------------|-------------------------|------------------------------|----------------------------------------------------------------|--------------------------------------------------|
| 1  | Unknown 1          | 4.67                    | ND                           | 775.8650 [M+2H] <sup>2+</sup><br>773.8514 [M-2H] <sup>2-</sup> | ND                                               |
| 2  | Unknown 2          | 4.89                    | ND                           | 1422.8126 [M+H] <sup>+</sup><br>1420.8195 [M-H] <sup>-</sup>   | ND                                               |
| 3  | Unknown 3          | 5.31                    | ND                           | 1177.2973 [M+2H] <sup>2+</sup>                                 | ND                                               |
| 4  | Unknown 4          | 9.43                    | 228.1958 [M+H] <sup>+</sup>  | 228.1966 [M+H] <sup>+</sup>                                    | C <sub>13</sub> H <sub>25</sub> NO <sub>2</sub>  |
| 5  | Unknown 5          | 9.54                    | ND                           | 795.2450 [M+Na] <sup>+</sup>                                   | ND                                               |
| 6  | Furaquinocin D     | 10.08                   | 431.1711 [M+FA] <sup>-</sup> | 431.1700 [M+FA] <sup>-</sup>                                   | C <sub>22</sub> H <sub>26</sub> O <sub>6</sub>   |
| 7  | Medelamine C       | 10.32                   | 272.2584 [M+H] <sup>+</sup>  | 272.2583 [M+H] <sup>+</sup>                                    | C <sub>16</sub> H <sub>33</sub> NO <sub>2</sub>  |
| 8  | C16 Sphingosine    | 10.83                   | 272.2584 [M+H] <sup>+</sup>  | 272.2578 [M+H] <sup>+</sup>                                    | C <sub>16</sub> H <sub>33</sub> NO <sub>2</sub>  |
| 9  | Unknown 6          | 11.09                   | ND                           | 616.1776 [M+H] <sup>+</sup>                                    | ND                                               |
| 10 | Streptorubin B     | 11.86                   | 392.2696 [M+H] <sup>+</sup>  | 392.2724 [M+H] <sup>+</sup>                                    | C <sub>25</sub> H <sub>33</sub> N <sub>3</sub> O |
| 11 | Unknown 7          | 12.05                   | ND                           | 847.4727 [M+H] <sup>+</sup>                                    | ND                                               |
| 12 | Undecylprodigiosin | 12.49                   | 394.2853 [M+H] <sup>+</sup>  | 394.2856 [M+H] <sup>+</sup>                                    | C <sub>25</sub> H <sub>35</sub> N <sub>3</sub> O |

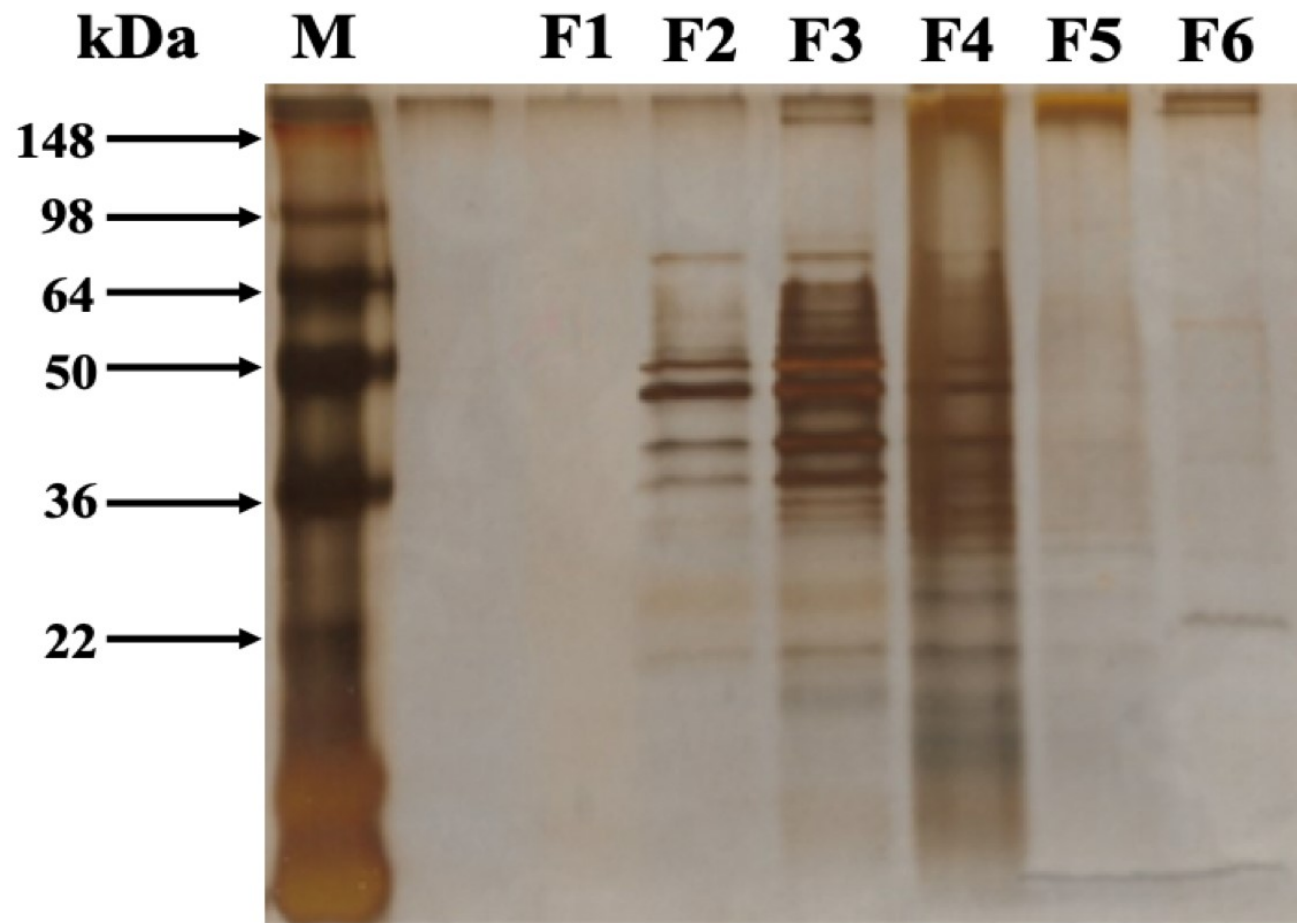

**Figure S1:** SDS-PAGE profile of Optiprep gradient fractions (F1-F6) of *S. coelicolor* supernatant. This figure shows a portion of the MV samples independently subjected to SDS-PAGE combined with proteomic and bioinformatic analyses.

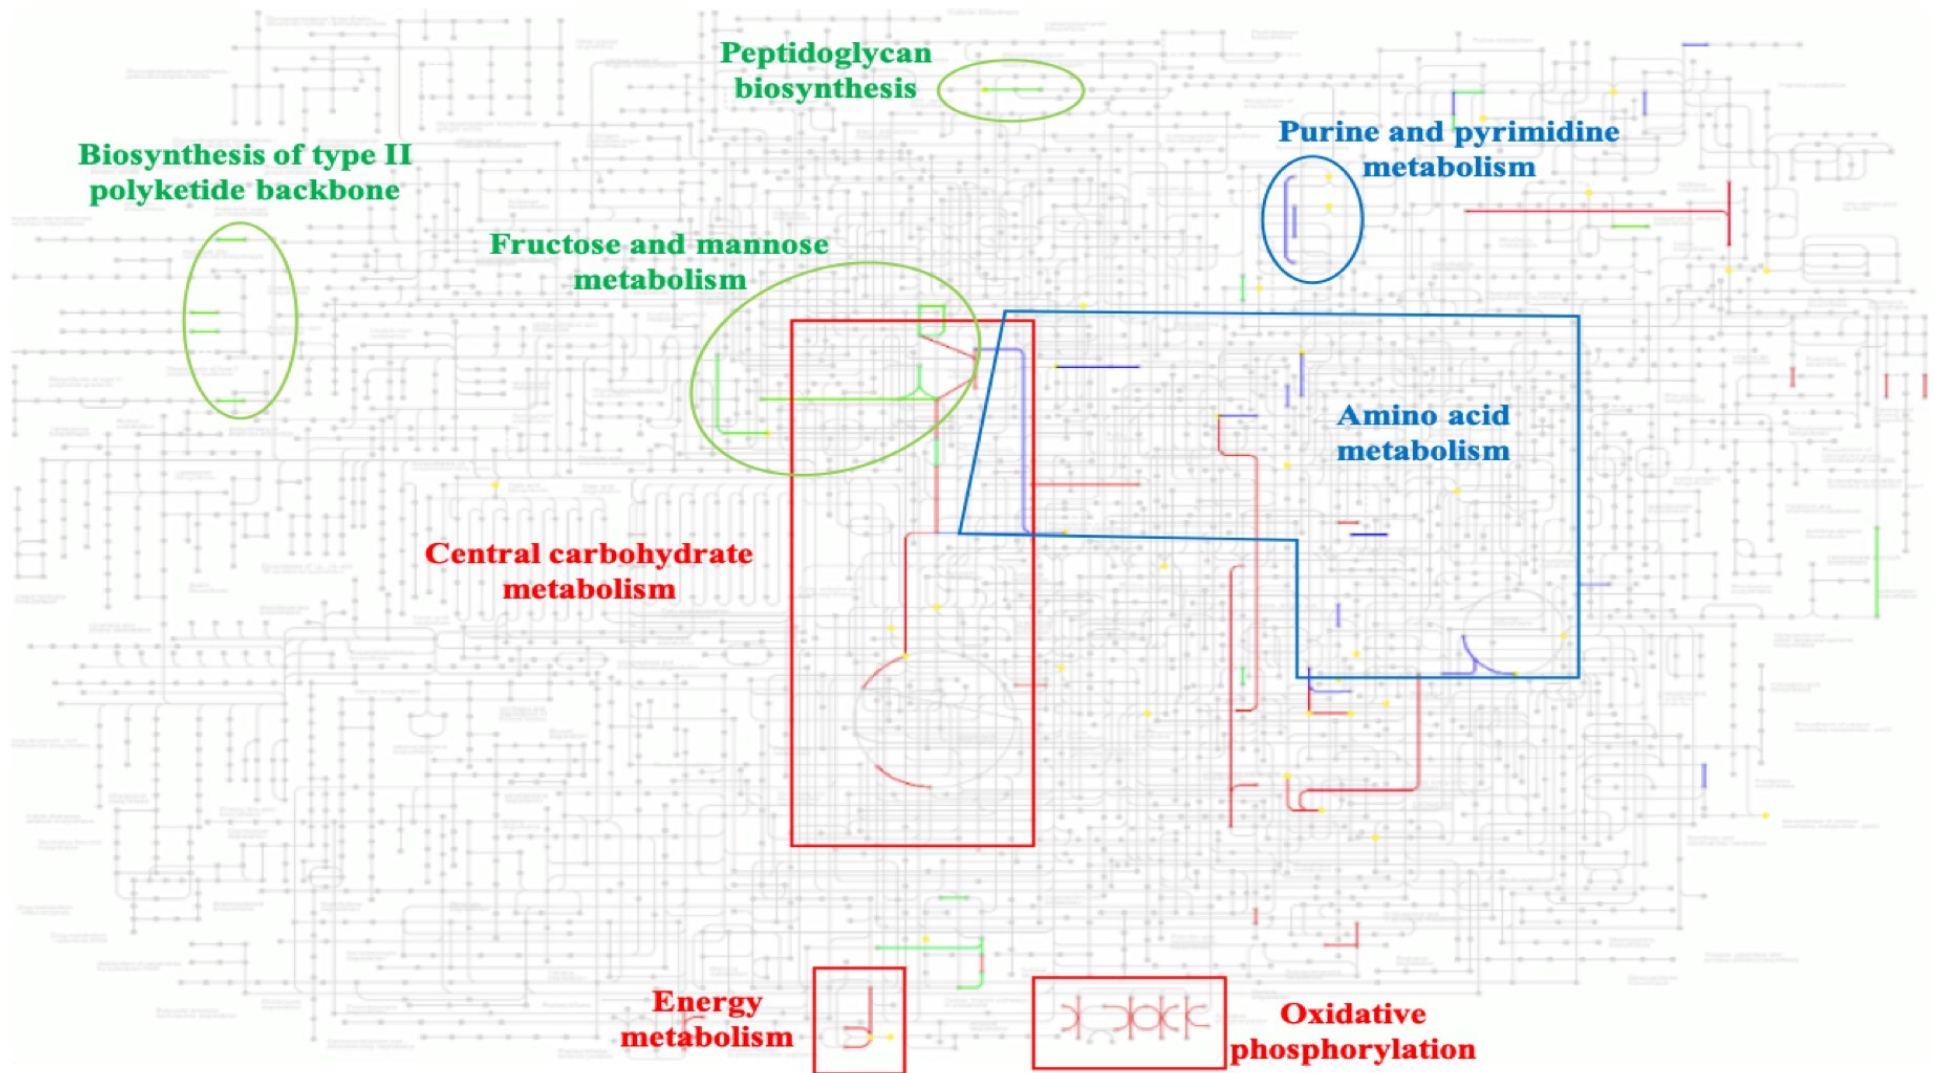

**Figure S2:** Combined KEGG proteomic and metabolic map of *S. coelicolor* MVs. F3 MVs-specific pathways are shown in green; F4 MVs-specific pathways are shown in blue; common pathways are shown in red, while metabolites are shown in yellow.



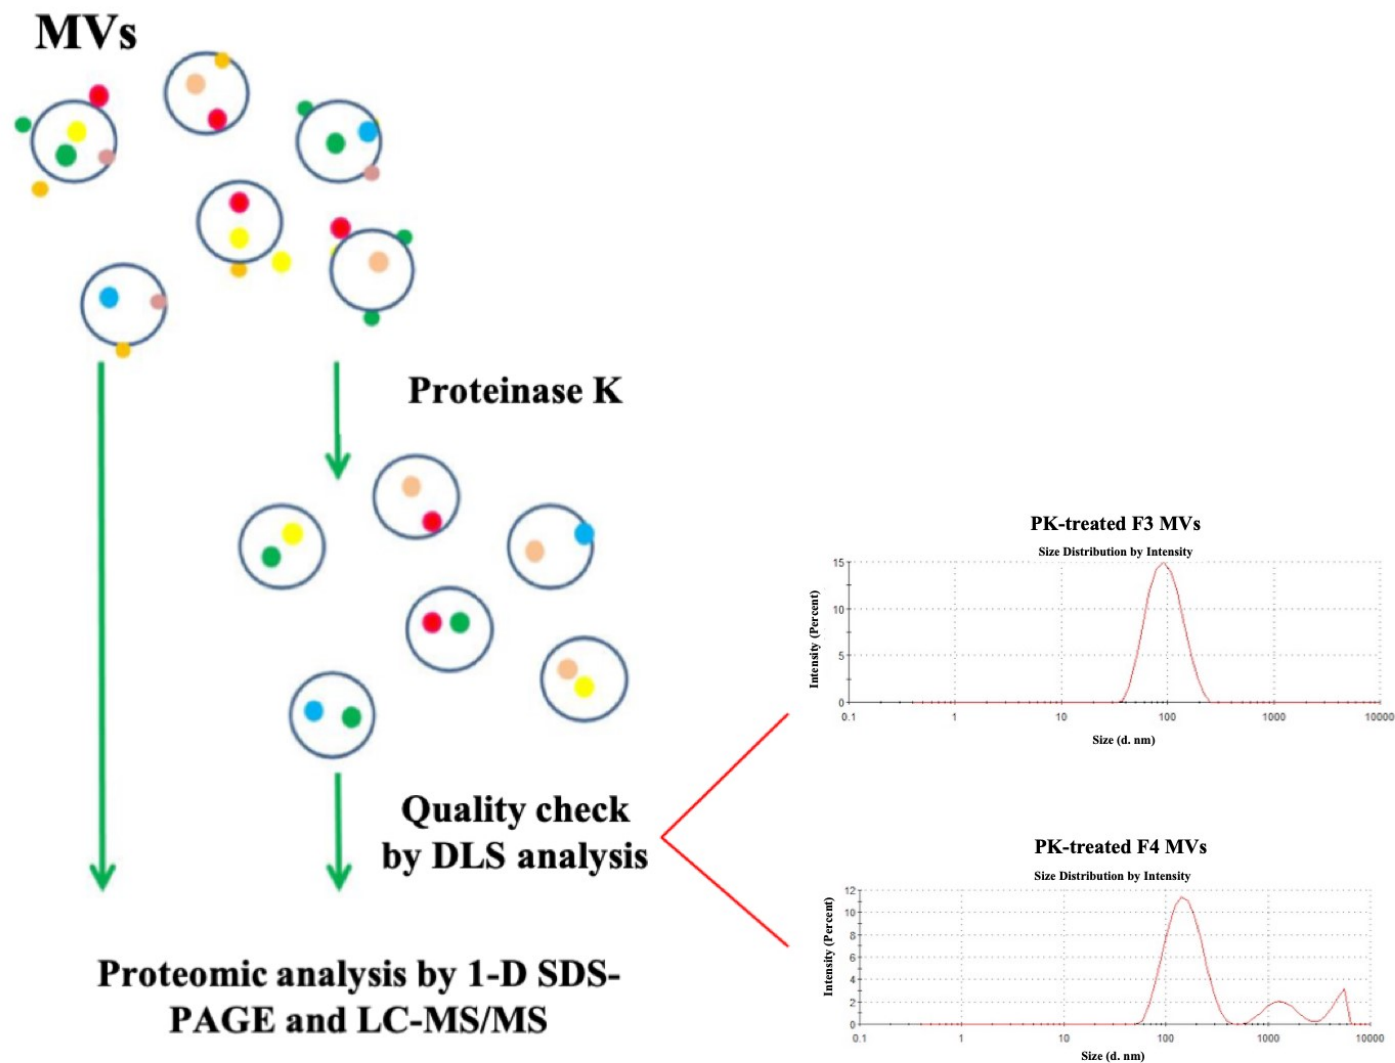

**Figure S3:** Diagram showing the experimental strategy to identify the luminal proteome of *S. coelicolor* MVs. MVs from fraction F3 and F4 were treated with proteinase K from *Tritirachium album* (PK). PK-treated and untreated MVs were analyzed in parallel by combined SDS-PAGE, proteomics and bioinformatics. DLS analysis revealed that PK treatment did not alter the vesicles.
